# Supplementary material for: The Role of Polymeric Coatings for a Safe-by-Design Development of Biomedical Gold Nanoparticles Assessed in Zebrafish Embryo
Source: MDPI journal article supplement (doi:10.3390/nano11041004), 2021-04-14
Supplement: s1 [file s1]

# Supplementary Material

Article

## The role of polymeric coatings for a safe-by-design development of biomedical gold nanoparticles assessed in Zebrafish embryo

Pamela Floris<sup>1†</sup>, Stefania Garbujo<sup>2†</sup>, Gabriele Rolla<sup>2</sup>, Marco Giustra<sup>2</sup>, Lucia Salvioni<sup>2</sup>, Tiziano Catelani<sup>3</sup>, Miriam Colombo<sup>2</sup>, Paride Mantecca<sup>1,4\*</sup>, Luisa Fiandra<sup>2,4\*</sup>

<sup>1</sup>POLARIS Research Centre, Dept. Of Earth and Environmental Sciences, University of Milano- Bicocca, Milan, Italy;

<sup>2</sup>Department of Biotechnology and Biosciences, University of Milano-Bicocca, Milan, Italy;

<sup>3</sup>Microscopy Facility, University of Milano-Bicocca, Milan, Italy;

<sup>4</sup>Centro 3R (Inter-University Center for the Promotion of the 3Rs Principles in Teaching & Research), Italy

\*Correspondence: luisa.fiandra@unimib.it, Tel.: +39-02-64483406; paride.mantecca@unimib.it, Tel.: +39-02-64482916

†equally contributed to the work

**Table S1** HT<sub>50</sub> calculated on embryos exposed to 0.001-1 nM of 6 or 15 nm GNP@PMA or GNP@PEG. hpf: hours post-fertilization; u: upper confidence limit; l: lower confidence limit; n.d.: not detectable

|                 | GNP@PMA 6 nm<br>hpf (u-l) | GNP@PMA 15 nm<br>hpf (u-l) | GNP@PEG 6 nm<br>hpf (u-l) | GNP@PEG 15 nm<br>hpf (u-l) |
|-----------------|---------------------------|----------------------------|---------------------------|----------------------------|
| <b>Control</b>  | 79.37 (76.90 - 83.02)     | 79.56 (76.71 - 84)         | 81.58 (77.64 - 85.56)     | 83.06 (78.57 - 87.86)      |
| <b>0.001 nM</b> | 81.51 (78.90 - 84.27)     | 75.66 (73.20 - 82.63)      | 85.19 (81.83 - 88.47)     | 80.82 (76.09 - 85.60)      |
| <b>0.01 nM</b>  | 76.26 (74.02 - 80.97)     | 74.89 (72.57 - 82.74)      | 92.13 (87.72 - 97.86)     | 75.42 (69.59 - 81.07)      |
| <b>0.1 nM</b>   | 78.12 (75.68 - 82.17)     | 74.40 (72.09 - 83.80)      | 87.66 (83.17 - 91.63)     | 78.03 (71.14 - 84.93)      |
| <b>1 nM</b>     | 74.74 (72.66 - 80.66)     | 76.09 (n.d.)               | 86.13 (82.08 - 90.16)     | 84.13 (76.89 - 92.02)      |

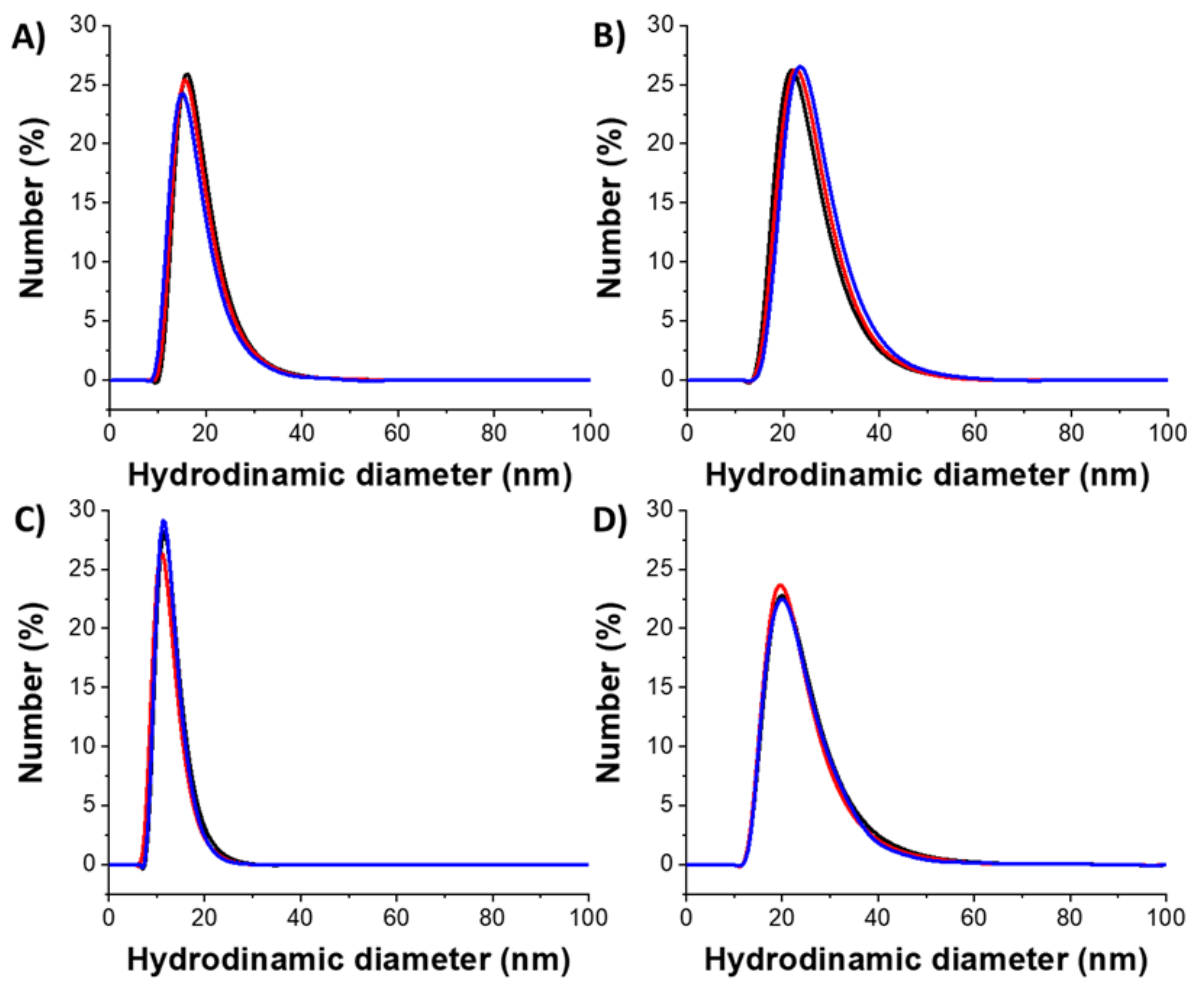

**Figure S1.** Distribution of hydrodynamic diameter about GNP measured by Dynamic Light Scattering of: A) 6 nm GNP@PEG, B) 15 nm GNP@PEG, C) 6 nm GNP@PMA, D) 15 nm GNP@PMA

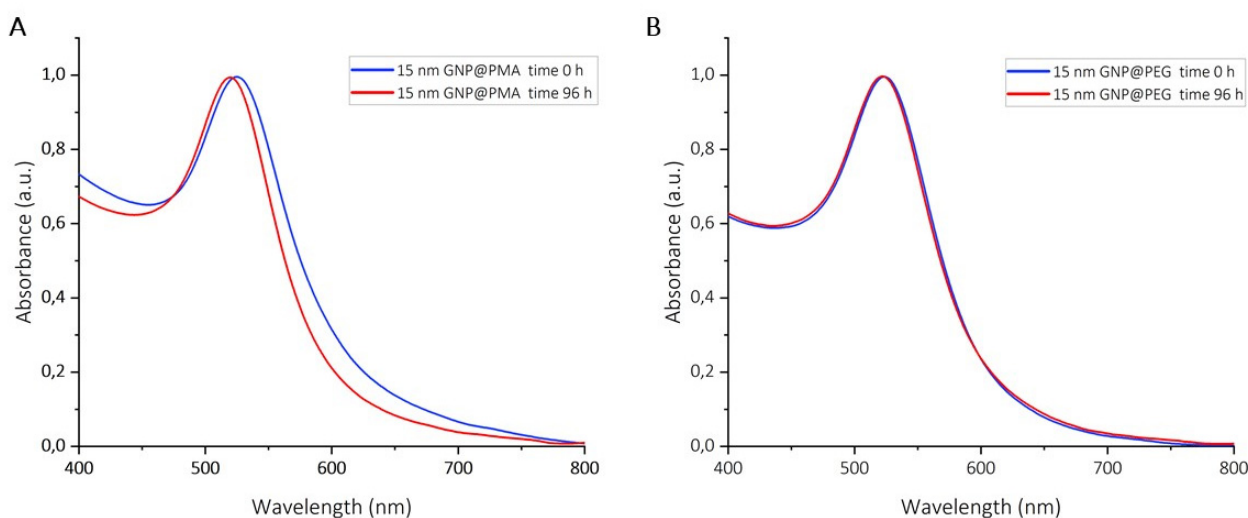

**Figure S2.** Stability of 15 nm GNP@PMA (A) and 15 nm GNP@PEG (B) in embryos solution was verified by UV-vis spectroscopy analysis immediately after their dilution (T= 0h) and after 96 hours of incubation (T= 96h).

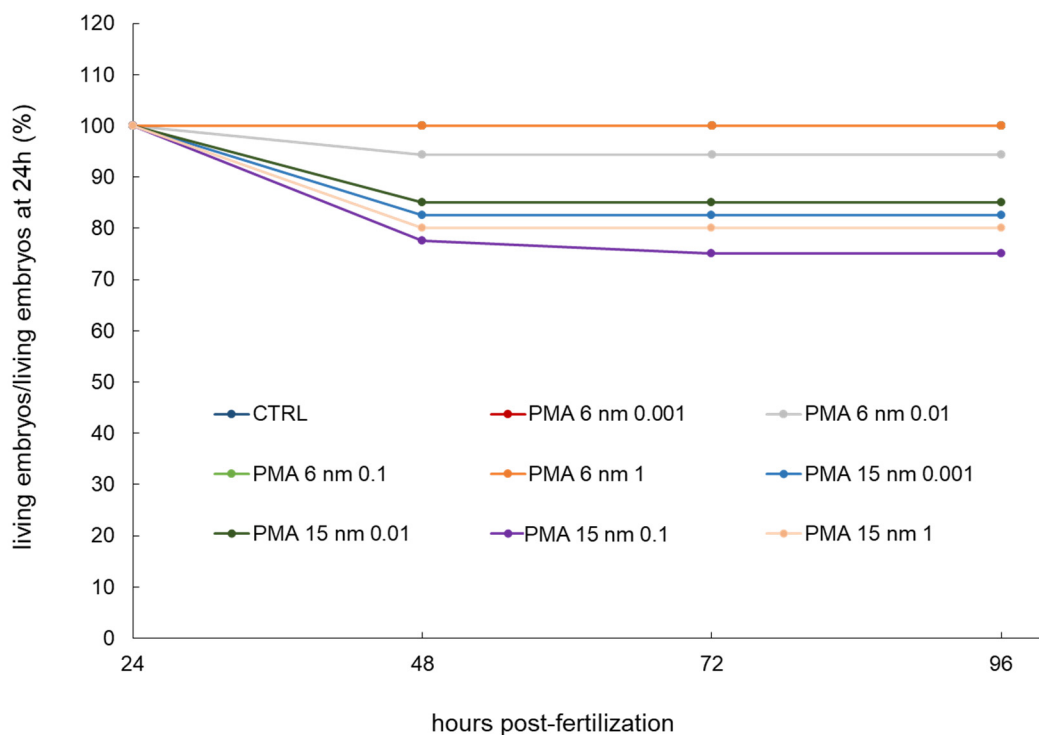

**Figure S3.** % of living embryos at 48, 72 and 96 hpf, after dechorionation (at 24 hpf) and exposure for to 6 nm or 15 nm GNP@PMA. Viability % has been calculated on the living embryos at 24 hpf. Embryos' viability values for CTRL, and for 6 nm GNP@PMA 0.001 and 0.1 nM, are all correspondent to 100% and therefore not visible into the graph.
